# Supplementary material
Source: publisher figshare collection journal article supplement (https://sage.figshare.com/ndownloader/files/12710384)
Supplement: Supplementary file 1 [file 12710384]

**Supplementary material**

| **Examination mode** | | | | | | |
| --- | --- | --- | --- | --- | --- | --- |
| **Score difference** | **Mode A** | **Cl**95% | **Mode B** | **Cl**95% | **Mode C** | **Cl**95% |
| None | **63,0%** | 49.2-77.1% | **63.0%** | 49.2-77.1% | **56.0%** | 41.2-70.0% |
| 1 | 32.0% | 19.5-46.7% | 25.0% | 14.6-40.3% | 38.0% | 24.7-52.8% |
| 2 | 4.0% | 0.5-13.7% | 8.0% | 2.2-19.2% | 5.0% | 1.2-16.5% |
| 3 | **1.0%** | 0.2-5.4% | **4.0%** | 0.5-13.7% | **1.0%** | 0.2-5.4% |
| 4 | 0.0% | 0.0-5.8% | 0.0% | 0.0-5.8% | 0.0% | 0.0-5.8% |

**Supplementary Table 4** Comparison of MeR score differences (%) in the left and right eye with the three examination modes.
